# Supplementary material for: Suspected Postpartum Depression Revealed to be CSF1R-Related Leukoencephalopathy: A Case Report
Source: PubMed Central journal article supplement — Case Rep Neurol. 2024 Oct 2;16(1):281–7. doi: 10.1159/000541551 (PMC11527462; doi:10.1159/000541551), 2024-10-02
Supplement: Supplementary_material-Suppl.1-s1.pdf [file Supplementary_material-Suppl.1-s1.pdf]

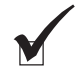

| Topic                           | Item | Checklist item description                                                                                   | Reported on Line                                                    |
|---------------------------------|------|--------------------------------------------------------------------------------------------------------------|---------------------------------------------------------------------|
| <b>Title</b>                    | 1    | The diagnosis or intervention of primary focus followed by the words "case report" .....                     | Line 2-3                                                            |
| <b>Key Words</b>                | 2    | 2 to 5 key words that identify diagnoses or interventions in this case report, including "case report" ..... | Line 24-25                                                          |
| <b>Abstract (no references)</b> | 3a   | Introduction: What is unique about this case and what does it add to the scientific literature? .....        | Line 29-33                                                          |
|                                 | 3b   | Main symptoms and/or important clinical findings .....                                                       | Line 35-37                                                          |
|                                 | 3c   | The main diagnoses, therapeutic interventions, and outcomes .....                                            | Line 37-38                                                          |
|                                 | 3d   | Conclusion—What is the main "take-away" lesson(s) from this case? .....                                      | Line 40-45                                                          |
| <b>Introduction</b>             | 4    | One or two paragraphs summarizing why this case is unique ( <b>may include references</b> ) .....            | Line 47-86                                                          |
| <b>Patient Information</b>      | 5a   | De-identified patient specific information .....                                                             | Line 89                                                             |
|                                 | 5b   | Primary concerns and symptoms of the patient .....                                                           | Line 96-103                                                         |
|                                 | 5c   | Medical, family, and psycho-social history including relevant genetic information .....                      | Line 89-96, 100-101                                                 |
|                                 | 5d   | Relevant past interventions with outcomes .....                                                              | Line 91-95                                                          |
| <b>Clinical Findings</b>        | 6    | Describe significant physical examination (PE) and important clinical findings .....                         | Line 103-106                                                        |
| <b>Timeline</b>                 | 7    | Historical and current information from this episode of care organized as a timeline .....                   | Line 106-115                                                        |
| <b>Diagnostic Assessment</b>    | 8a   | Diagnostic testing (such as PE, laboratory testing, imaging, surveys). .....                                 | Line 114-115                                                        |
|                                 | 8b   | Diagnostic challenges (such as access to testing, financial, or cultural) .....                              | N/A                                                                 |
|                                 | 8c   | Diagnosis (including other diagnoses considered) .....                                                       | Line 114-115                                                        |
|                                 | 8d   | Prognosis (such as staging in oncology) where applicable .....                                               | N/A                                                                 |
| <b>Therapeutic Intervention</b> | 9a   | Types of therapeutic intervention (such as pharmacologic, surgical, preventive, self-care) .....             | Line 115-117                                                        |
|                                 | 9b   | Administration of therapeutic intervention (such as dosage, strength, duration) .....                        | N/A                                                                 |
|                                 | 9c   | Changes in therapeutic intervention (with rationale) .....                                                   | N/A                                                                 |
| <b>Follow-up and Outcomes</b>   | 10a  | Clinician and patient-assessed outcomes (if available) .....                                                 | Line 117-120                                                        |
|                                 | 10b  | Important follow-up diagnostic and other test results .....                                                  | N/A                                                                 |
|                                 | 10c  | Intervention adherence and tolerability (How was this assessed?) .....                                       | N/A                                                                 |
|                                 | 10d  | Adverse and unanticipated events .....                                                                       | N/A                                                                 |
| <b>Discussion</b>               | 11a  | A scientific discussion of the strengths AND limitations associated with this case report .....              | Line 123-131                                                        |
|                                 | 11b  | Discussion of the relevant medical literature <b>with references</b> .....                                   | Line 131-180                                                        |
|                                 | 11c  | The scientific rationale for any conclusions (including assessment of possible causes) .....                 | Line 181-192                                                        |
|                                 | 11d  | The primary "take-away" lessons of this case report (without references) in a one paragraph conclusion ..... | Line 195-200                                                        |
| <b>Patient Perspective</b>      | 12   | The patient should share their perspective in one to two paragraphs on the treatment(s) they received .....  | N/A                                                                 |
| <b>Informed Consent</b>         | 13   | Did the patient give informed consent? Please provide if requested .....                                     | Yes <input checked="" type="checkbox"/> No <input type="checkbox"/> |
